# Supplementary material
Source: MDPI journal article supplement (https://www.mdpi.com/2411-9660/2/3/25)
Supplement: s1 [file s1]

# Materials and Stages Adopted in Fabrication of Temperature Controlled – Chamber for Materials Testing

The images and fabrication processes during the fabrication of temperature controlled - chamber

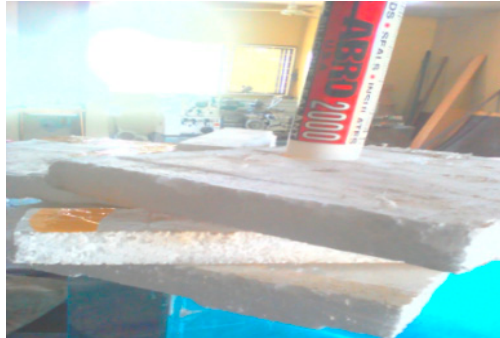

Figure S1: Polystyrene lagging material and RTV silicone sealant.

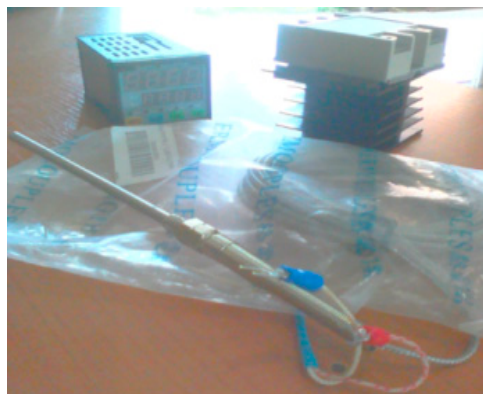

Figure S2: Temperature sensor, solid state relay and temperature controller.

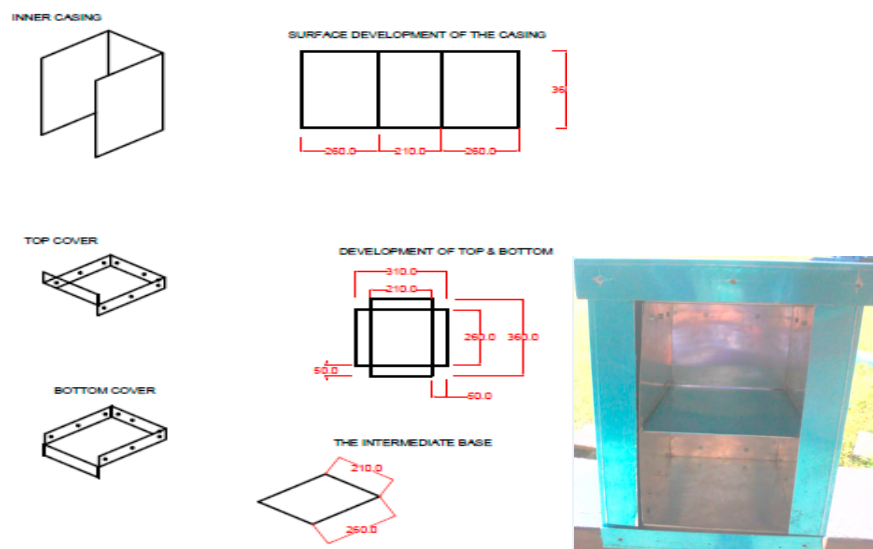

Figure S3: Inner compartment of the surface developed chamber.

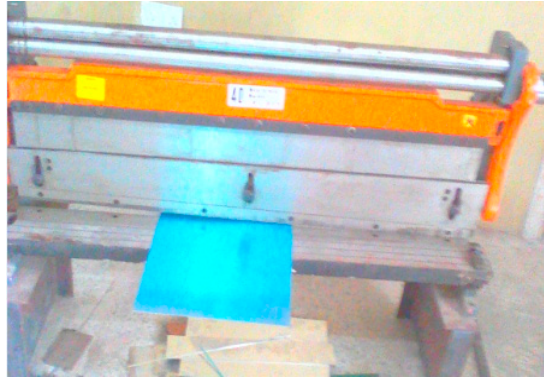

Figure S4: Folding marked out aluminum sheet by metal folding machine.

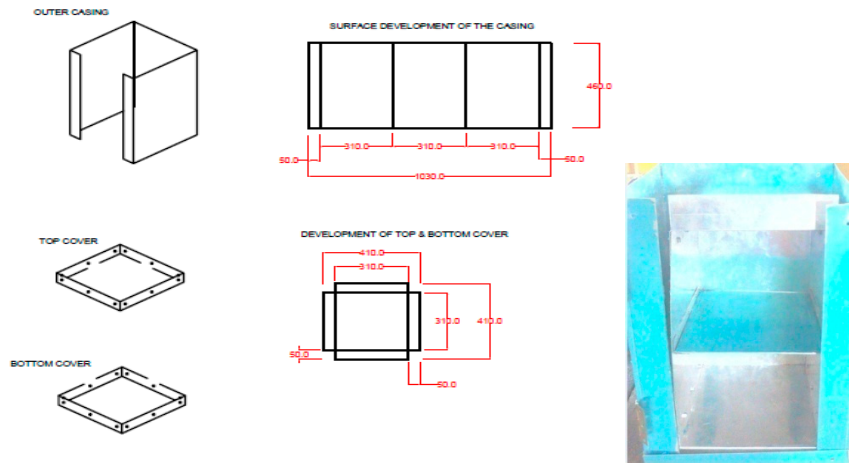

Figure S5: The outer compartment of the chamber

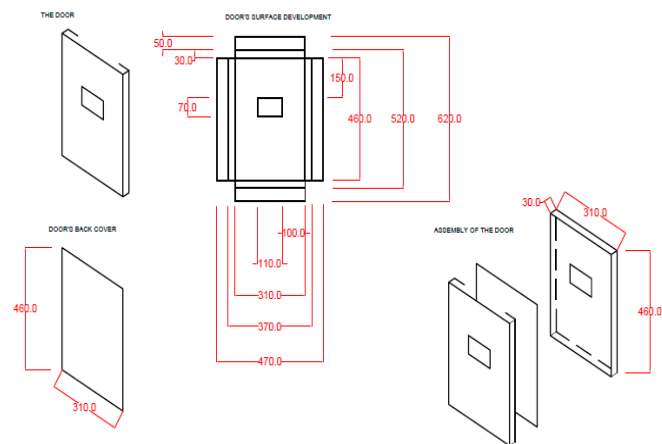

Figure S6: Developed door of the chamber.

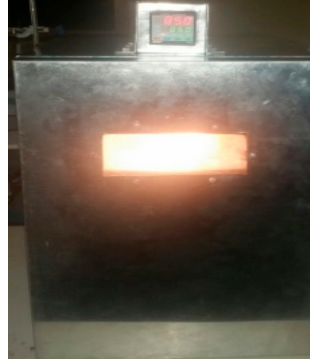

Figure S7: Constructed and functioning temperature chamber.
